# Incidence and Progression Patterns of Chronic Pain Disparities Revealed by Analyzing the All of Us Research Program Data

Edwin Baldwin, BS<sup>1</sup>, Jin Zhou, PhD<sup>2</sup>, Wenting Luo, MS<sup>3</sup>, W. Michael Hooten, MD<sup>4,\*</sup>, Jungwei W. Fan, PhD<sup>5,\*</sup>, Haiquan Li, PhD<sup>1,3,\*</sup>

\*Corresponding author

Email: [haiquan@arizona.edu](mailto:haiquan@arizona.edu) (HL), [Fan.Jung-wei@mayo.edu](mailto:Fan.Jung-wei@mayo.edu) (JWF), [Hooten.William@mayo.edu](mailto:Hooten.William@mayo.edu) (WMH)

<sup>1</sup>Department of Biosystems Engineering, University of Arizona, Tucson AZ USA 85721

<sup>2</sup>Department of Biostatistics, University of California at Los Angeles, Los Angeles, CA USA 90095

<sup>3</sup>Statistics and Data Science Graduate Interdisciplinary Program, University of Arizona, Tucson AZ USA 85721

<sup>4</sup>Division of Pain Medicine, Department of Anesthesiology. Mayo Clinic, Rochester, MN USA 55905

<sup>5</sup>Department of Artificial Intelligence & Informatics. Mayo Clinic, Rochester, MN 55905

## Abstract

Disparities in the progression of ten chronic overlapping pain conditions (COPC) and four comorbid mental disorders among traditionally underrepresented populations have rarely been reported in the literature. In this study, we conducted retrospective cohort analyses using All of Us Research Program data from 1981 to 2022 to address this issue. Separate cohorts were created to assess the disparities by sex, race, and ethnicity. Logistic regression models, controlling for demographic variables, were employed to identify significant disparity factors associated with the progression from one COPC or mental condition to another. Among 122 frequent disease pairs, we identified demographic disparities in nine progression pathways. For example, we found an increased likelihood of subsequent depression after irritable bowel syndrome in Hispanics versus non-Hispanic individuals (OR:3.13,  $p<10^{-10}$ ). To our knowledge, this is the first study to unveil demographic disparities in COPC progression. These findings underscore the importance of examining health disparities among individuals affected by multiple chronic pain conditions.

## Author Summary

Understanding the disparities in chronic overlapping pain conditions (COPC) can aid patients and clinicians in managing and optimizing therapy. Although disparities have been extensively reported for individual COPCs, progression disparity between conditions has been rarely studied. This study addresses this gap by identifying multiple disparities related to sex, race, and ethnicity in COPC progression, providing valuable insights for patients and clinicians to help prevent the exacerbation of other COPCs.

## Introduction

Chronic overlapping pain conditions (COPCs), defined as a collection of chronic pain syndromes that often co-occur (1), significantly impact lives worldwide. COPCs can impede a person's daily activities, mental health, and overall quality of life. In this study, we focus on ten chronic pains, commonly referred to as COPCs in literature: chronic low back pains (CLBP), migraine (MHA), irritable bowel syndrome (IBS), temporomandibular disorders (TMD), fibromyalgia (FM), chronic fatigue syndrome (CFS), chronic tension-type headache (CTTH), endometriosis (ENDO), vulvodynia (VVD), and urologic chronic pelvic pain syndrome (UCPPS). They are closely related to mental health conditions including anxiety, depression, bipolar disorder, and schizophrenia (2).

The experience of pain is not uniform but profoundly shaped by the interplay of demographic factors, including sex, gender, age, race, ethnicity, and socioeconomic status (e.g., income) (3, 4), resulting in disparities known to particularly affect marginalized communities (5). Previous research reported a strong association between demographic background (such as racial minority groups) (3) and pain-related health outcomes (6), as well as evidence indicating that people with socioeconomic challenges also encounter greater obstacles in accessing pain management (7). However, there has been limited work investigating demographic disparities in the progression of COPCs and their comorbid mental health disorders. To address this gap, we studied the demographic disparities in COPCs based on a large-scale longitudinal cohort from the All of Us Research Program (AoURP) (8), which by design, has prioritized underrepresented populations during recruitment.

The primary objective of the research is to discover statistically significant disparity factors associated with one of the ten COPC conditions and four comorbid mental health conditions. We sought to reveal the progression patterns among these COPC and mental conditions, which were of special interest for their well-documented interactions with COPCs (9, 10). The study represents the first of its kind that

applied rigorous statistics to identify health disparities and socioeconomic predictors in COPCs, specifically among progression patterns. Our results contribute to understanding the disparate, nuanced clinical experiences in COPCs, advocating for both accessible and individualized chronic pain care that fits each patient’s unique context (7, 11).

**Results**

Of the 242,835 patients with valid electronic health records in the AoURP v7 dataset, 61,383 (25.3%) had at least one COPC condition. Table 1 shows the demographic information of the COPC cases and their comorbid mental disorders.

**Table 1: Demographic Characteristics of the Study COPC Cases.**

| All of Us Research Program |                                           |                |
|----------------------------|-------------------------------------------|----------------|
| (n=61,383)                 |                                           |                |
| Sex                        |                                           |                |
|                            | Female                                    | 42,580 (69.4%) |
|                            | Male                                      | 17,356 (28.3%) |
|                            | Other or Unknown                          | 1,447 (2.3%)   |
| Race                       |                                           |                |
|                            | Asian                                     | 856 (1.4%)     |
|                            | Black or African American                 | 11,511 (18.9%) |
|                            | Native Hawaiian or Other Pacific Islander | 55 (0.09%)     |
|                            | Other or Mixed                            | 2,017 (3.3%)   |
|                            | Unknown                                   | 10,580 (17.2%) |
|                            | White                                     | 36,364 (59.2%) |

---

**Ethnicity**

|              |                |
|--------------|----------------|
| Hispanic     | 9,825 (16.0%)  |
| Non-Hispanic | 48,909 (79.7%) |
| Others       | 3,760 (4.3%)   |

---

**COPC Incidence**

|                                               |                |
|-----------------------------------------------|----------------|
| Chronic fatigue syndrome (CFS)                | 2,546 (4.15%)  |
| Chronic lower back pain (CLBP)                | 32,440 (52.8%) |
| Chronic tension-type headache (CTTH)          | 524 (0.85%)    |
| Endometriosis (ENDO)                          | 1,236 (2.01%)  |
| Fibromyalgia (FM)                             | 5,208 (8.48%)  |
| Irritable bowel syndrome (IBS)                | 6,190 (10.1%)  |
| Migraine (MHA)                                | 14,582 (23.8%) |
| Temporomandibular disorder (TMD)              | 1,654 (2.69%)  |
| Urologic chronic pelvic pain syndrome (UCPPS) | 666 (1.08%)    |
| Vulvodynia (VVD)                              | 95 (0.15%)     |

---

**Mental Health Conditions**

|                     |                |
|---------------------|----------------|
| Anxiety             | 39,044 (63.6%) |
| Depressive disorder | 36,095 (58.8%) |
| Bipolar disorder    | 6,273 (10.2%)  |
| Schizophrenia       | 1,557 (2.54%)  |

---

*Note: Percentages in the parentheses represent the proportion among the COPC cases only, not the prevalence of the general population.*

Table 2 demonstrates the elevated risk of specific COPCs in females and in non-White races, based on multiple logistic regression studies of these variables using demographically matched cohorts (see Materials and Methods). Significance is defined as a corrected p-value below the 0.05 threshold, adjusted for the socioeconomic factor of income levels. For example, fibromyalgia has an odds ratio of 5.81 in females ( $p=6.9 \times 10^{-10}$ ), indicating that females are five times more likely to be diagnosed with fibromyalgia than males. Similarly, for migraine headaches (MHA), females exhibit an odds ratio of 2.52 ( $p=2.33 \times 10^{-11}$ ), suggesting females are more than twice as likely to have MHA compared to males. Along the race variable, Black or African American persons have an odds ratio of 1.18 in developing chronic lower back pain (CLBP,  $p<9.18 \times 10^{-15}$ ) even after adjusting for income levels.

The incidence of mental disorders also showed significant demographic associations. Females present higher odds ratios of 1.39 and 1.33 with adjusted p-values of  $1.13 \times 10^{-3}$  and  $1.19 \times 10^{-2}$  respectively in developing anxiety and depression. For schizophrenia, a significant odds ratio of 2.16 ( $p<10^{-10}$ ) was observed in Black or African American persons, which corroborates the literature (12, 13).

**Table 2: Enrichment for individual pain conditions observed in females and non-White races.**

| Disease     | Cases  | Sex    |         |                           |                                 |                          |                                           |
|-------------|--------|--------|---------|---------------------------|---------------------------------|--------------------------|-------------------------------------------|
|             |        | Female | Asian   | Black or African American | Middle Eastern or North African | More than One Population | Native Hawaiian or Other Pacific Islander |
| <b>CFS</b>  | 2,684  | ns     | 0.49**  | 0.40***                   | ns                              | ns                       | ns                                        |
| <b>CLBP</b> | 38,154 | ns     | 0.64*** | 1.18***                   | ns                              | ns                       | ns                                        |
| <b>CTTH</b> | 551    | ns     | ns      | ns                        | ns                              | ns                       | ns                                        |

|                      |        |           |         |         |        |        |       |
|----------------------|--------|-----------|---------|---------|--------|--------|-------|
| <b>ENDO</b>          | 1,428  | exclusive | ns      | ns      | ns     | ns     | ns    |
| <b>FM</b>            | 5,550  | 5.81***   | 0.31*** | 0.46*** | ns     | ns     | ns    |
| <b>IBS</b>           | 7,037  | ns        | 0.33*** | 0.35*** | ns     | ns     | ns    |
| <b>MHA</b>           | 18,074 | 2.52***   | 0.36*** | 0.54*** | ns     | ns     | ns    |
| <b>TMD</b>           | 1,818  | ns        | ns      | 0.62**  | ns     | ns     | ns    |
| <b>UCPPS</b>         | 773    | ns        | ns      | 0.36**  | ns     | ns     | ns    |
| <b>VVD</b>           | 107    | exclusive | ns      | ns      | ns     | ns     | ns    |
| <b>Anxiety</b>       | 45,662 | 1.39**    | 0.35*** | 0.46*** | 0.59** | 0.78** | 0.42* |
| <b>Bipolar</b>       | 7,699  | ns        | 0.32*** | 0.62*** | 0.36*  | ns     | ns    |
| <b>Depression</b>    | 45,172 | 1.33**    | 0.38*** | 0.62*** | 0.65** | ns     | ns    |
| <b>Schizophrenia</b> | 2,045  | ns        | ns      | 2.16*** | ns     | ns     | ns    |

---

*Note:* OR: odds ratio. ns: insignificant, \*:  $10^{-3} \leq p < 0.05$ , \*\*:  $10^{-6} \leq p < 10^{-3}$ , \*\*\*:  $p < 10^{-6}$ . The reference group for sex is male, and the reference group for race is White.

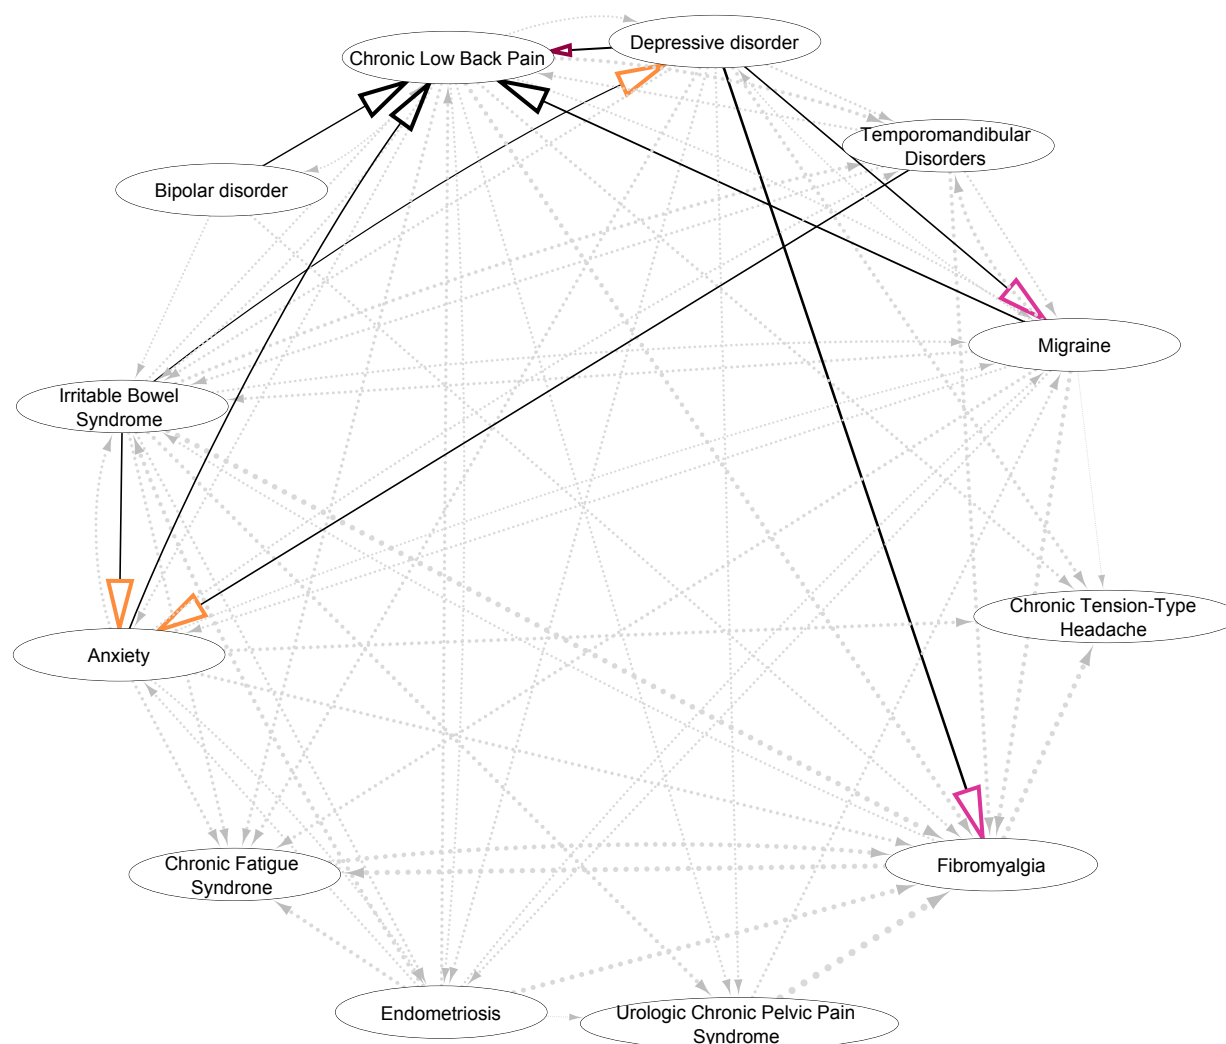

**Fig 1. The overrepresentation of specific pairwise relations between COPC and mental conditions, in females and non-White races.** Each node represents either a specific pain condition or mental disorder. Arrows represent significant trajectories of sequential occurrences of conditions based on reference demographics (white, non-Hispanic, or male). Solid edges with hollow triangle arrows represent further enrichment for specific demographic subgroups that are color-coded: each Black arrow indicates that for the specific directed pair of conditions Black or African American persons have significantly higher risk in comparison to White persons. Likewise, orange arrows for Hispanic or Latino persons as compared to non-Hispanic persons, purple arrows for females compared to males, and dark purple arrows for



females vs. males or African Americans vs. Whites. Dashed edges represent significant trajectories among the reference population groups.

Fig 1 demonstrates how sex, race, and ethnicity might be associated with the likelihood of developing a second COPC or mental condition following a first for 122 frequent (at least 21 occurrences) pairs of conditions that consist of at least one COPC in the pair. The connections between nodes indicate how strongly these conditions are associated with each other in sequence, by using regression analysis with White, non-Hispanic, or males as the reference group. CLBP exhibits the strongest disparity among the COPC conditions: Black or African American persons with migraine, anxiety, or depressive disorders are more likely to develop CLBP than White persons (shown in black arrows). The odds ratios of developing CLBP following migraine, anxiety, depressive, and bipolar disorders are 1.46, 1.46, 1.38, and 1.26, all statistically significant (adjusted  $p \leq 0.005$ ), as compared to White persons. These contribute to the overall enrichment of CLBP in Black or African American persons ( $OR=1.18$ , adjusted  $p < 10^{-10}$ , Table 2).

The Hispanic population was found more likely to develop anxiety after TMD ( $OR=3.00$ , adjusted  $p=0.017$ ) or IBS ( $OR=2.42$ , adjusted  $p < 10^{-10}$ ), and develop depressive disorder after IBS ( $3.13$ , adjusted  $p < 10^{-10}$ ), as compared to non-Hispanic populations (shown in orange arrows). The findings indicate certain COPCs and mental health progression patterns are disproportionate across ethnic groups. Lastly, we observed sex disparity in the progression of COPC comorbidities: females were more likely to develop FM ( $OR=3.00$ , adjusted  $p=0.014$ ), MHA ( $OR=1.86$ , adjusted  $p=0.013$ ), and CLBP ( $OR=1.50$ , adjusted  $p=0.011$ ) after depressive disorders (shown in dark purple arrows). Of note, income level was adjusted during the examination of disparity, and the effect was concordant to the literature. Specifically, we found lower income is associated with an elevated risk of subsequently developing

another COPC or mental disorder, as compared to the highest income group (\$200,000 USD annually), with an  $OR \geq 1.09$  and an adjusted  $p < 0.05$ , except for a few cases that were underpowered.

## Materials and Methods

We used the AoURP(8) version 7, which involved the 1981-2022 electronic health records (EHR) of over 250,000 participants. Only individuals sharing EHR data were included, and those whose data showed apparent quality issues were also excluded. Variables studied include incidence of each COPC and mental condition, sex at birth, age, ethnicity, race, gender, and income level. Then, statistical differences were derived from the comparison between an examined level of a disparity factor and its reference level (e.g., female sex at birth versus male) with respect to a COPC/mental condition outcome. The research protocol received a waiver from the Institutional Review Board (IRB) of the University of Arizona.

The determination of COPC/mental cases is as follows:

(1) Identifying episodes of COPC and mental conditions: We cataloged COPC and mental health conditions using the ICD-10 (14) and ICD-9 (1) codes recognized by the research community. Utilizing terms from the literature and descriptions, we linked the conditions to the corresponding standard concept IDs in AoURP. These codes and concept IDs formed the criteria for identifying potential cases.

(2) Establishing chronicity: A condition was deemed chronic if it was diagnosed on at least two separate episodes, a minimum of 90 days apart, aligning with standards accepted by the pain research community.

(3) Determining the incidence, or earliest onset: To establish each patient's order of distinct conditions, we identified the earliest onset or incidence for each condition based on diagnosis dates. Additionally,

we mandated that the onset of each condition of a patient occurs at least one year after his/her first EHR record, to minimize bias from incomplete historical data.

The conditions were first analyzed for their disproportionate effect on underrepresented groups, then for elevated risk to progress to other conditions, using reference groups for comparison. We built a separate cohort for each disparity factor's incidence of developing a COPC/mental disease or progressing to another COPC. The process of cohort selection for each analysis proceeded as follows:

(1) Building a cohort for each disparity level in developing a COPC/mental condition: Each level (e.g., African American) of a disparity factor (e.g., race) was compared to a reference level (e.g., White). We constructed a cohort of participants based on the studied or the reference level, choosing the smaller level whenever applicable. The same number of participants were selected for each of the two levels, further matched by other demographic variables, such as sex at birth, birth year (categorized in decade intervals), and race. We conducted random sampling without replacement from the factor group that had more samples (usually the reference group, e.g., White), ensuring an equivalent number of participants from the larger group for each demographic combination. Infrequently, when there were not enough samples to achieve a complete demographic match for a particular demographic feature combination, we opted for partial matching. The hierarchy for matching was sex, followed by birth year group, and then race.

(2) Building a cohort for each disease progression with at least 21 occurrences (per AoU policy): Starting from any COPC/mental condition, we divided the participants with EHR into two groups, those with and without the start condition. We then matched the patients with the starting COPC/mental condition from those without the condition, by the sex, age interval, and race, similar to the procedure above. Then, we examined the difference in the incidence of other conditions after the start of the COPC/mental condition between the two groups of participants. We determined the

disparity effect of demographic factors as compared to their reference level concerning this specific cohort of disease progression.

After building the cohort for each study, we evaluated the elevated risk of developing the first or progressing to another condition. Each COPC/mental condition other than the start condition served as an outcome variable for the cohort. We applied a logistic regression model to assess the statistical significance of each disparity factor, specifically the odds ratio of developing or progressing to the outcome condition, relative to the reference level. An odds ratio exceeding 1 with statistical significance suggests a disparity in the condition. We also included a socioeconomic factor in the model: income level. In this analysis, birth year was treated as numerical data, whereas sex, race, ethnicity, and income level were handled as categorical variables. To account for the possibility of multiple comparison errors, we applied the Bonferroni correction. This approach is thorough and robust, leveraging longitudinal data to recapture pairwise chronic pain condition progression and demonstrate disparities.

## Discussion

Our results recaptured previous evidence (15) on the disparity of COPC incidence, which may be attributed to subconscious biases within the healthcare system (16). Moreover, the study made a unique contribution by elucidating disparities linked to specific progression patterns of these conditions (17). For example, an increased risk for Hispanic populations to develop anxiety or depression after IBS. While demographic disparities in developing individual COPC conditions have been frequently reported, studies investigating disparities in their progression are rare. Not only that multiple COPCs are associated with more complex outcomes (18), but the nuanced progression disparities offer critical information on potentially optimizing chronic pain management and cross-specialty coordination.

Not all observed progressions were statistically significant across demographic variables (e.g., sex) for some COPCs. This outcome is likely due to the underpowered nature of certain cohort groups, limiting the ability to detect subtle differences in COPC progression. The limitation in statistical power may stem from the sample sizes for progression between some COPC pairs (19) (e.g., between CTTH and TMD) or in certain strata, particularly when the data is segmented by multiple dimensions such as age, sex, race, and socioeconomic status. Despite these limitations, the observed trends offer valuable insights into the complex interplay among these factors in shaping chronic pain manifestations.

Future research should be able to build on the discovered correlations, exploring the causes and effects of these correlations. Our progression analysis represents a promising approach to health disparity research, especially as more data becomes available. For example, there is limited data for studying chronic pain disparities experienced by intersex persons (20). Such research is crucial for developing effective pain management strategies to address the needs of diverse populations (21).

In conclusion, research on progressions in health disparities in individuals with chronic overlapping pain conditions (COPCs) remains limited. By leveraging rich longitudinal data in the All of Us Research Program, we conducted a novel study to evaluate the disparate risk across demographic groups for their progression patterns in developing one COPC or mental condition after another. Our results not only reinforced existing evidence, but also uncovered lesser-known associations, such as the higher risk of progressing from IBS to depressive disorder in Hispanic populations (OR:3.13, adjusted  $p < 10^{-10}$ ). By recognizing the confluence of demographic and socioeconomic factors, we anticipate such data-driven research will inform more contextualized strategies in caring for our diverse populations affected by chronic pains.

## Acknowledgements

This work is funded by NIDCR/NIH R21DE031424. We gratefully acknowledge All of Us participants for their contributions, without whom this research would not have been possible. We also thank the National Institutes of Health's All of Us Research Program for making available the participant data examined in this study.

## References

1. Irwin MN, Smith MA. Validation of ICD-9 codes for identification of chronic overlapping pain conditions. *Journal of Pain & Palliative Care Pharmacotherapy*. 2022;36(3):166-77.
2. Goesling J, Lin LA, Clauw DJ. Psychiatry and pain management: at the intersection of chronic pain and mental health. *Current psychiatry reports*. 2018;20:1-8.
3. Quiton RL, Leibel DK, Boyd EL, Waldstein SR, Evans MK, Zonderman AB. Sociodemographic patterns of pain in an urban community sample: an examination of intersectional effects of sex, race, age, and poverty status. *Pain*. 2020;161(5):1044-51.
4. Michael GE, Sporer KA, Youngblood GM. Women are less likely than men to receive prehospital analgesia for isolated extremity injuries. *The American journal of emergency medicine*. 2007;25(8):901-6.
5. Green CR, Anderson KO, Baker TA, Campbell LC, Decker S, Fillingim RB, et al. The unequal burden of pain: confronting racial and ethnic disparities in pain. *Pain medicine*. 2003;4(3):277-94.
6. Hollingshead NA, Meints SM, Miller MM, Robinson ME, Hirsh AT. A comparison of race-related pain stereotypes held by White and Black individuals. *Journal of applied social psychology*. 2016;46(12):718-23.
7. Thurston KL, Zhang SJ, Wilbanks BA, Billings R, Aroke EN. A systematic review of race, sex, and socioeconomic status differences in postoperative pain and pain management. *Journal of PeriAnesthesia Nursing*. 2023;38(3):504-15.
8. Sankar PL, Parker LS. The Precision Medicine Initiative's All of Us Research Program: an agenda for research on its ethical, legal, and social issues. *Genetics in Medicine*. 2017;19(7):743-50.
9. Hooten WM, editor *Chronic pain and mental health disorders: shared neural mechanisms, epidemiology, and treatment*. Mayo Clinic Proceedings; 2016: Elsevier.
10. Fillingim RB, Ohrbach R, Greenspan JD, Sanders AE, Rathnayaka N, Maixner W, et al. Associations of psychologic factors with multiple chronic overlapping pain conditions. *Journal of oral & facial pain and headache*. 2020;34(Suppl):s85.
11. Charleston IV L. Headache disparities in African-Americans in the United States: a narrative review. *Journal of the National Medical Association*. 2021;113(2):223-9.
12. Bresnahan M, Begg MD, Brown A, Schaefer C, Sohler N, Insel B, et al. Race and risk of schizophrenia in a US birth cohort: another example of health disparity? *International journal of epidemiology*. 2007;36(4):751-8.
13. Olbert CM, Nagendra A, Buck B. Meta-analysis of Black vs. White racial disparity in schizophrenia diagnosis in the United States: Do structured assessments attenuate racial disparities? *Journal of abnormal psychology*. 2018;127(1):104.

14. Schrepf A, Phan V, Clemens JQ, Maixner W, Hanauer D, Williams DA. ICD-10 codes for the study of chronic overlapping pain conditions in administrative databases. *The journal of pain*. 2020;21(1-2):59-70.
15. Meints SM, Wang V, Edwards RR. Sex and race differences in pain sensitization among patients with chronic low back pain. *The Journal of Pain*. 2018;19(12):1461-70.
16. Hoffman KM, Trawalter S, Axt JR, Oliver MN. Racial bias in pain assessment and treatment recommendations, and false beliefs about biological differences between blacks and whites. *Proceedings of the National Academy of Sciences*. 2016;113(16):4296-301.
17. Hamilton TM, Reese JC, Air EL. Health care disparity in pain. *Neurosurgery Clinics*. 2022;33(3):251-60.
18. Logan DE, Donado C, Kaczynski K, Lebel A, Schechter N. From one pain to many: the emergence of overlapping pains in children and adolescents. *The Clinical Journal of Pain*. 2021;37(6):404-12.
19. Zeng C, Schlueter DJ, Tran TC, Babbar A, Cassini T, Bastarache LA, et al. Comparison of phenomic profiles in the All of Us Research Program against the US general population and the UK Biobank. *Journal of the American Medical Informatics Association*. 2024;31(4):846-54.
20. Osborne NR, Davis KD. Sex and gender differences in pain. *International Review of Neurobiology*. 164: Elsevier; 2022. p. 277-307.
21. Hirsh A, Hollingshead N, Bair M, Matthias M, Wu J, Kroenke K. The influence of patient's sex, race and depression on clinician pain treatment decisions. *European Journal of Pain*. 2013;17(10):1569-79.



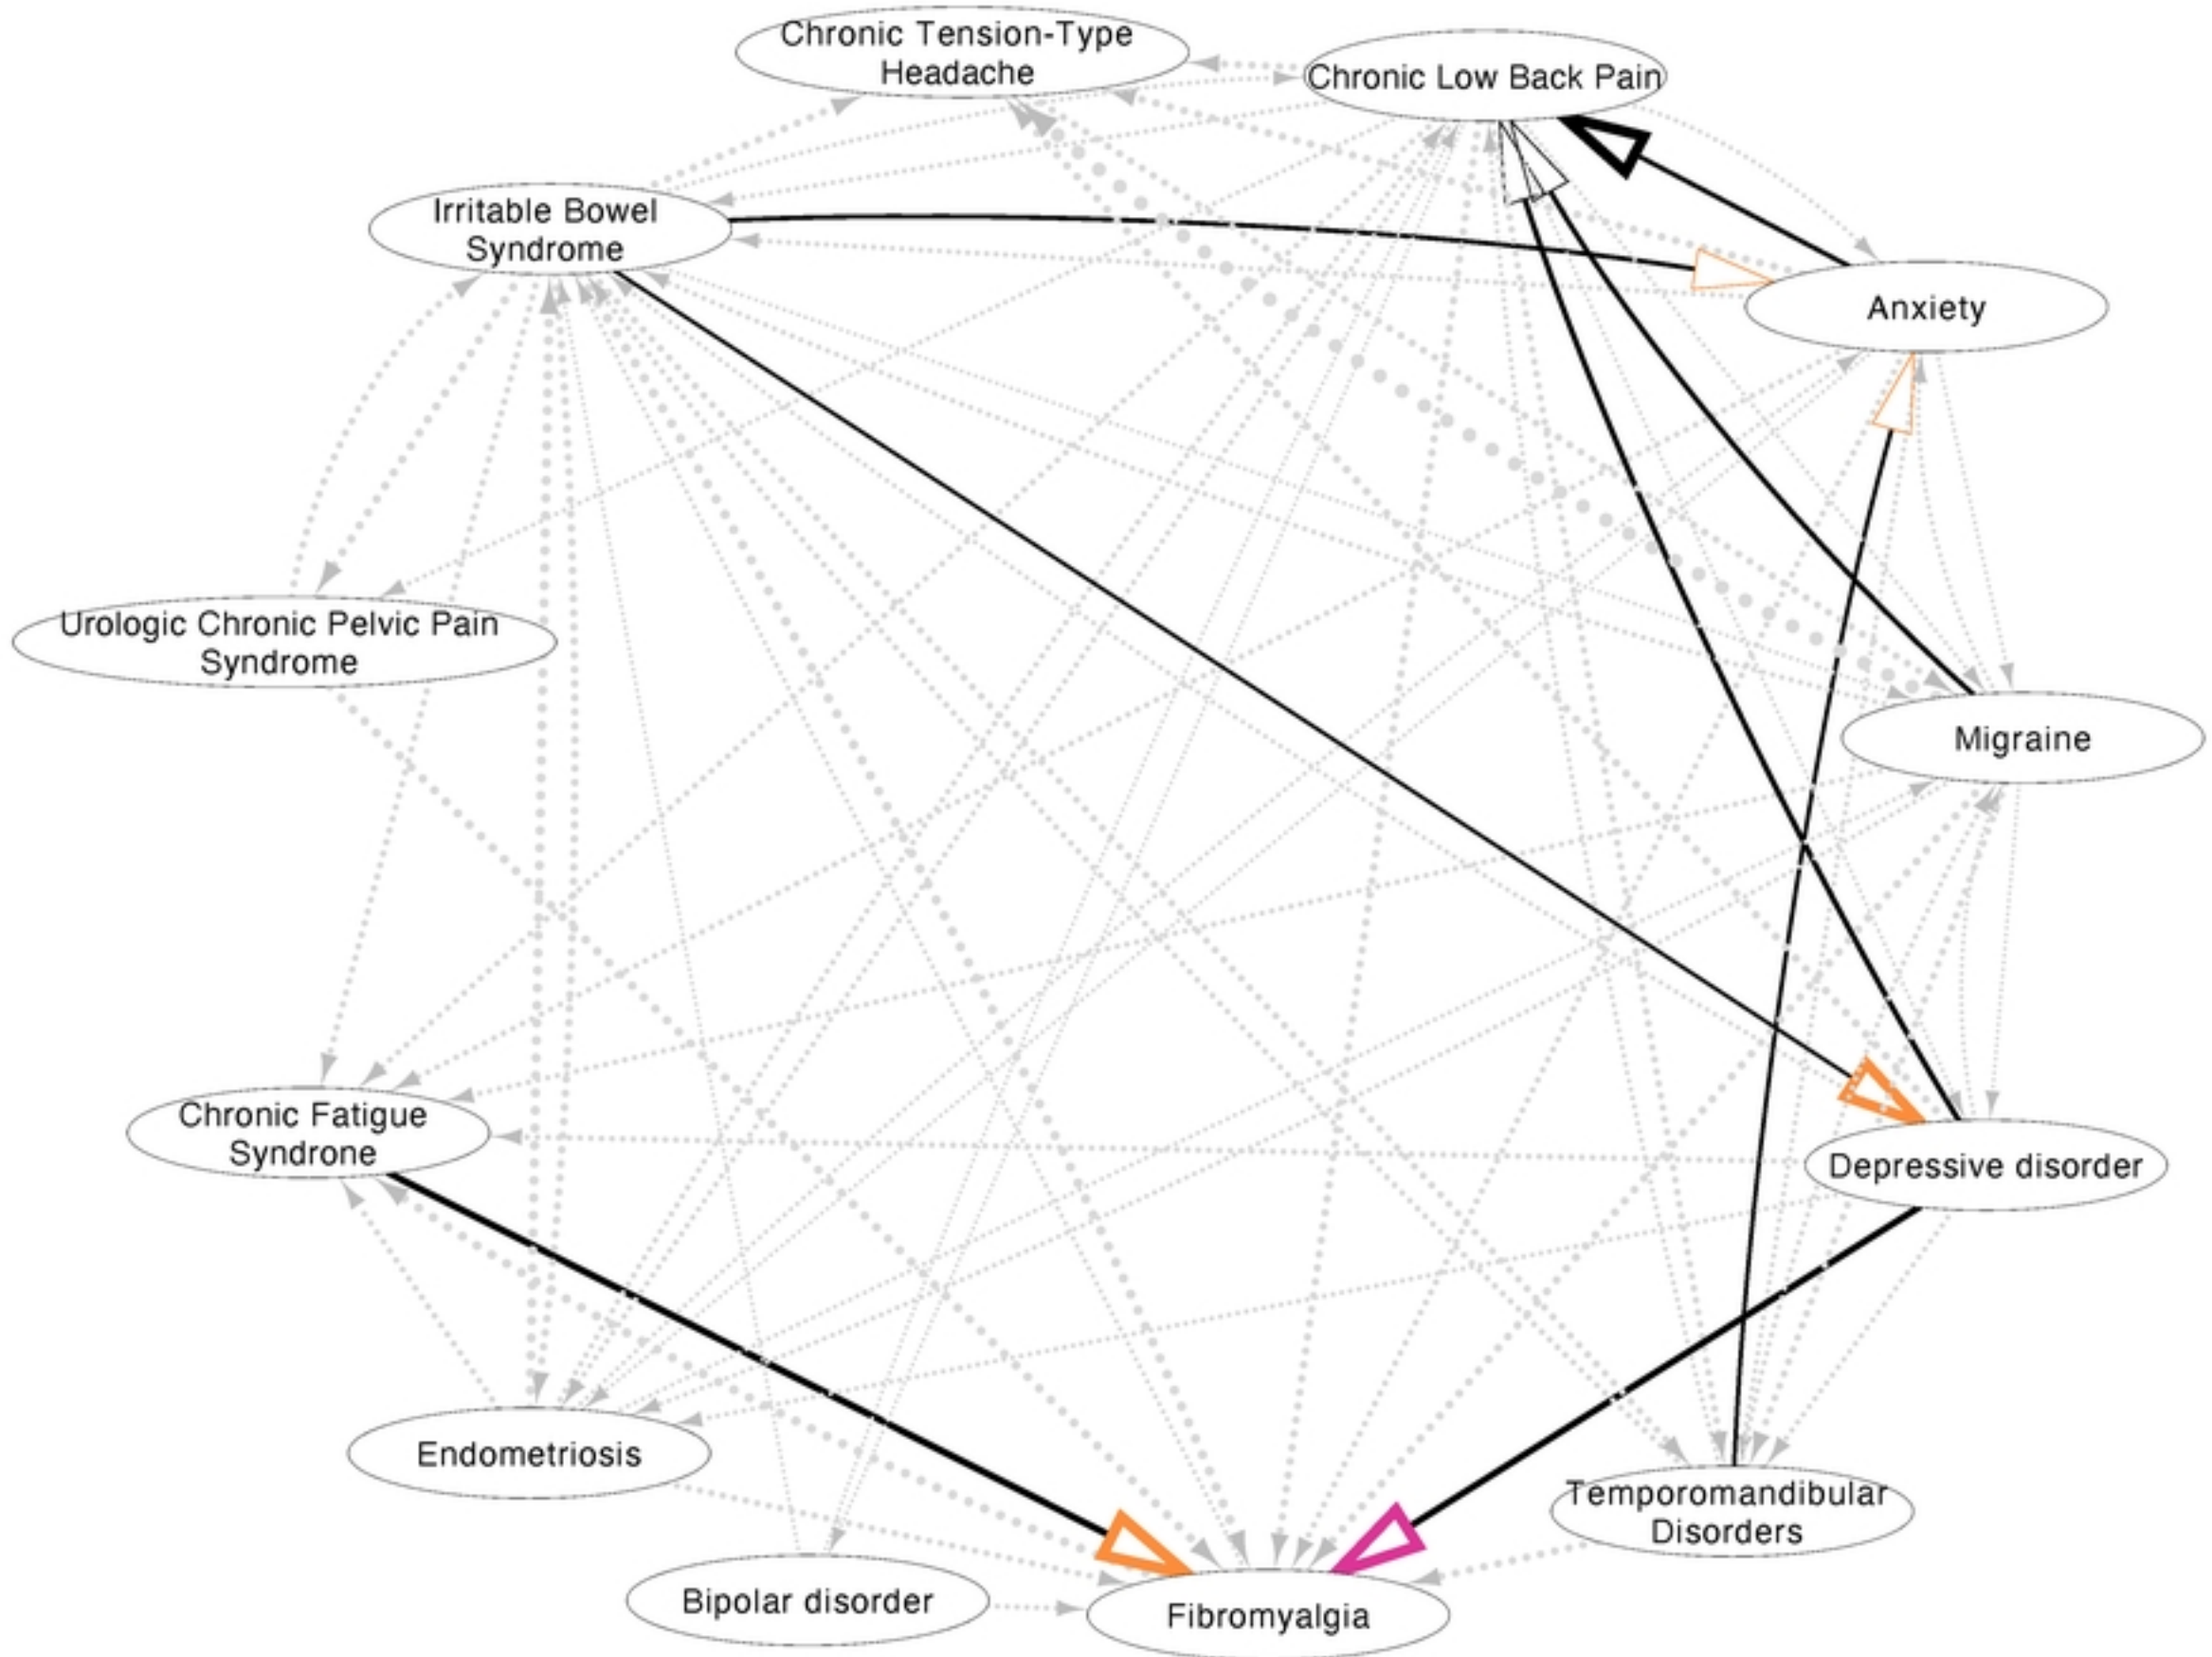

Fig 1
