1 **Incidence and Progression Patterns of Chronic Pain Disparities**  
2 **Revealed by Analyzing the All of Us Research Program Data**

3 Edwin Baldwin, BS<sup>1</sup>, Jin Zhou, PhD<sup>2</sup>, Wenting Luo, MS<sup>3</sup>, W. Michael Hooten, MD<sup>4,\*</sup>, Jungwei W. Fan,  
4 PhD<sup>5,\*</sup>, Haiquan Li, PhD<sup>1,3,\*</sup>

5

6 \*Corresponding author

7 Email: [haiquan@arizona.edu](mailto:haiquan@arizona.edu) (HL), [Fan.Jung-wei@mayo.edu](mailto:Fan.Jung-wei@mayo.edu) (JWF), [Hooten.William@mayo.edu](mailto:Hooten.William@mayo.edu) (WMH)

8

9 <sup>1</sup>Department of Biosystems Engineering, University of Arizona, Tucson AZ USA 85721

10 <sup>2</sup>Department of Biostatistics, University of California at Los Angeles, Los Angeles, CA USA 90095

11 <sup>3</sup>Statistics and Data Science Graduate Interdisciplinary Program, University of Arizona, Tucson AZ USA  
12 85721

13 <sup>4</sup>Division of Pain Medicine, Department of Anesthesiology. Mayo Clinic, Rochester, MN USA 55905

14 <sup>5</sup>Department of Artificial Intelligence & Informatics. Mayo Clinic, Rochester, MN 55905

15

16

17 **Abstract**

18 Disparities in the progression of ten chronic overlapping pain conditions (COPC) and four comorbid  
19 mental disorders among traditionally underrepresented populations have rarely been reported in the  
20 literature. In this study, we conducted retrospective cohort analyses using All of Us Research Program  
21 data from 1981 to 2022 to address this issue. Separate cohorts were created to assess the disparities by  
22 sex, race, and ethnicity. Logistic regression models, controlling for demographic variables, were  
23 employed to identify significant disparity factors associated with the progression from one COPC or  
24 mental condition to another. Among 122 frequent disease pairs, we identified demographic disparities  
25 in nine progression pathways. For example, we found an increased likelihood of subsequent depression  
26 after irritable bowel syndrome in Hispanics versus non-Hispanic individuals (OR:3.13,  $p < 10^{-10}$ ). To our  
27 knowledge, this is the first study to unveil demographic disparities in COPC progression. These findings  
28 underscore the importance of examining health disparities among individuals affected by multiple  
29 chronic pain conditions.

30 **Author Summary**

31 Understanding the disparities in chronic overlapping pain conditions (COPC) can aid patients and  
32 clinicians in managing and optimizing therapy. Although disparities have been extensively reported for  
33 individual COPCs, progression disparity between conditions has been rarely studied. This study  
34 addresses this gap by identifying multiple disparities related to sex, race, and ethnicity in COPC  
35 progression, providing valuable insights for patients and clinicians to help prevent the exacerbation of  
36 other COPCs.

37

## 38 **Introduction**

39 Chronic overlapping pain conditions (COPCs), defined as a collection of chronic pain syndromes  
40 that often co-occur (1), significantly impact lives worldwide. COPCs can impede a person’s daily  
41 activities, mental health, and overall quality of life. In this study, we focus on ten chronic pains,  
42 commonly referred to as COPCs in literature: chronic low back pains (CLBP), migraine (MHA), irritable  
43 bowel syndrome (IBS), temporomandibular disorders (TMD), fibromyalgia (FM), chronic fatigue  
44 syndrome (CFS), chronic tension-type headache (CTTH), endometriosis (ENDO), vulvodynia (VVD), and  
45 urologic chronic pelvic pain syndrome (UCPPS). They are closely related to mental health conditions  
46 including anxiety, depression, bipolar disorder, and schizophrenia (2).

47 The experience of pain is not uniform but profoundly shaped by the interplay of demographic factors,  
48 including sex, gender, age, race, ethnicity, and socioeconomic status (e.g., income) (3, 4), resulting in  
49 disparities known to particularly affect marginalized communities (5). Previous research reported a  
50 strong association between demographic background (such as racial minority groups) (3) and pain-  
51 related health outcomes (6), as well as evidence indicating that people with socioeconomic challenges  
52 also encounter greater obstacles in accessing pain management (7). However, there has been limited  
53 work investigating demographic disparities in the progression of COPCs and their comorbid mental  
54 health disorders. To address this gap, we studied the demographic disparities in COPCs based on a large-  
55 scale longitudinal cohort from the All of Us Research Program (AoURP) (8), which by design, has  
56 prioritized underrepresented populations during recruitment.

57 The primary objective of the research is to discover statistically significant disparity factors associated  
58 with one of the ten COPC conditions and four comorbid mental health conditions. We sought to reveal  
59 the progression patterns among these COPC and mental conditions, which were of special interest for  
60 their well-documented interactions with COPCs (9, 10). The study represents the first of its kind that

61 applied rigorous statistics to identify health disparities and socioeconomic predictors in COPCs,  
 62 specifically among progression patterns. Our results contribute to understanding the disparate, nuanced  
 63 clinical experiences in COPCs, advocating for both accessible and individualized chronic pain care that  
 64 fits each patient’s unique context (7, 11).

65 **Results**

66 Of the 242,835 patients with valid electronic health records in the AoURP v7 dataset, 61,383 (25.3%) had  
 67 at least one COPC condition. Table 1 shows the demographic information of the COPC cases and their  
 68 comorbid mental disorders.

69 **Table 1: Demographic Characteristics of the Study COPC Cases.**

|             |                                           | <b>All of Us Research Program<br/>(n=61,383)</b> |
|-------------|-------------------------------------------|--------------------------------------------------|
| <b>Sex</b>  |                                           |                                                  |
|             | Female                                    | 42,580 (69.4%)                                   |
|             | Male                                      | 17,356 (28.3%)                                   |
|             | Other or Unknown                          | 1,447 (2.3%)                                     |
| <b>Race</b> |                                           |                                                  |
|             | Asian                                     | 856 (1.4%)                                       |
|             | Black or African American                 | 11,511 (18.9%)                                   |
|             | Native Hawaiian or Other Pacific Islander | 55 (0.09%)                                       |
|             | Other or Mixed                            | 2,017 (3.3%)                                     |
|             | Unknown                                   | 10,580 (17.2%)                                   |
|             | White                                     | 36,364 (59.2%)                                   |

---

**Ethnicity**

|              |                |
|--------------|----------------|
| Hispanic     | 9,825 (16.0%)  |
| Non-Hispanic | 48,909 (79.7%) |
| Others       | 3,760 (4.3%)   |

---

**COPC Incidence**

|                                               |                |
|-----------------------------------------------|----------------|
| Chronic fatigue syndrome (CFS)                | 2,546 (4.15%)  |
| Chronic lower back pain (CLBP)                | 32,440 (52.8%) |
| Chronic tension-type headache (CTTH)          | 524 (0.85%)    |
| Endometriosis (ENDO)                          | 1,236 (2.01%)  |
| Fibromyalgia (FM)                             | 5,208 (8.48%)  |
| Irritable bowel syndrome (IBS)                | 6,190 (10.1%)  |
| Migraine (MHA)                                | 14,582 (23.8%) |
| Temporomandibular disorder (TMD)              | 1,654 (2.69%)  |
| Urologic chronic pelvic pain syndrome (UCPPS) | 666 (1.08%)    |
| Vulvodynia (VVD)                              | 95 (0.15%)     |

---

**Mental Health Conditions**

|                     |                |
|---------------------|----------------|
| Anxiety             | 39,044 (63.6%) |
| Depressive disorder | 36,095 (58.8%) |
| Bipolar disorder    | 6,273 (10.2%)  |
| Schizophrenia       | 1,557 (2.54%)  |

---

70 *Note: Percentages in the parentheses represent the proportion among the COPC cases only,*  
71 *not the prevalence of the general population.*

72

73 Table 2 demonstrates the elevated risk of specific COPCs in females and in non-White races, based on  
74 multiple logistic regression studies of these variables using demographically matched cohorts (see  
75 Materials and Methods). Significance is defined as a corrected p-value below the 0.05 threshold,  
76 adjusted for the socioeconomic factor of income levels. For example, fibromyalgia has an odds ratio of  
77 5.81 in females ( $p=6.9 \times 10^{-10}$ ), indicating that females are five times more likely to be diagnosed with  
78 fibromyalgia than males. Similarly, for migraine headaches (MHA), females exhibit an odds ratio of 2.52  
79 ( $p=2.33 \times 10^{-11}$ ), suggesting females are more than twice as likely to have MHA compared to males. Along  
80 the race variable, Black or African American persons have an odds ratio of 1.18 in developing chronic  
81 lower back pain (CLBP,  $p<9.18 \times 10^{-15}$ ) even after adjusting for income levels.

82 The incidence of mental disorders also showed significant demographic associations. Females present  
83 higher odds ratios of 1.39 and 1.33 with adjusted p-values of  $1.13 \times 10^{-3}$  and  $1.19 \times 10^{-2}$  respectively in  
84 developing anxiety and depression. For schizophrenia, a significant odds ratio of 2.16 ( $p<10^{-10}$ ) was  
85 observed in Black or African American persons, which corroborates the literature (12, 13).

86

87 **Table 2: Enrichment for individual pain conditions observed in females and non-White races.**

| Disease     | Cases  | Sex    |         | Race                      |                                 |                          |                                           |
|-------------|--------|--------|---------|---------------------------|---------------------------------|--------------------------|-------------------------------------------|
|             |        | Female | Asian   | Black or African American | Middle Eastern or North African | More than One Population | Native Hawaiian or Other Pacific Islander |
| <b>CFS</b>  | 2,684  | ns     | 0.49**  | 0.40***                   | ns                              | ns                       | ns                                        |
| <b>CLBP</b> | 38,154 | ns     | 0.64*** | 1.18***                   | ns                              | ns                       | ns                                        |
| <b>CTTH</b> | 551    | ns     | ns      | ns                        | ns                              | ns                       | ns                                        |

|                      |        |           |         |         |        |        |       |
|----------------------|--------|-----------|---------|---------|--------|--------|-------|
| <b>ENDO</b>          | 1,428  | exclusive | ns      | ns      | ns     | ns     | ns    |
| <b>FM</b>            | 5,550  | 5.81***   | 0.31*** | 0.46*** | ns     | ns     | ns    |
| <b>IBS</b>           | 7,037  | ns        | 0.33*** | 0.35*** | ns     | ns     | ns    |
| <b>MHA</b>           | 18,074 | 2.52***   | 0.36*** | 0.54*** | ns     | ns     | ns    |
| <b>TMD</b>           | 1,818  | ns        | ns      | 0.62**  | ns     | ns     | ns    |
| <b>UCPPS</b>         | 773    | ns        | ns      | 0.36**  | ns     | ns     | ns    |
| <b>VVD</b>           | 107    | exclusive | ns      | ns      | ns     | ns     | ns    |
| <b>Anxiety</b>       | 45,662 | 1.39**    | 0.35*** | 0.46*** | 0.59** | 0.78** | 0.42* |
| <b>Bipolar</b>       | 7,699  | ns        | 0.32*** | 0.62*** | 0.36*  | ns     | ns    |
| <b>Depression</b>    | 45,172 | 1.33**    | 0.38*** | 0.62*** | 0.65** | ns     | ns    |
| <b>Schizophrenia</b> | 2,045  | ns        | ns      | 2.16*** | ns     | ns     | ns    |

---

88 *Note: OR: odds ratio. ns: insignificant, \*:  $10^{-3} \leq p < 0.05$ , \*\*:  $10^{-6} \leq p < 10^{-3}$ , \*\*\*:  $p < 10^{-6}$ . The reference group*

89 *for sex is male, and the reference group for race is White.*

90

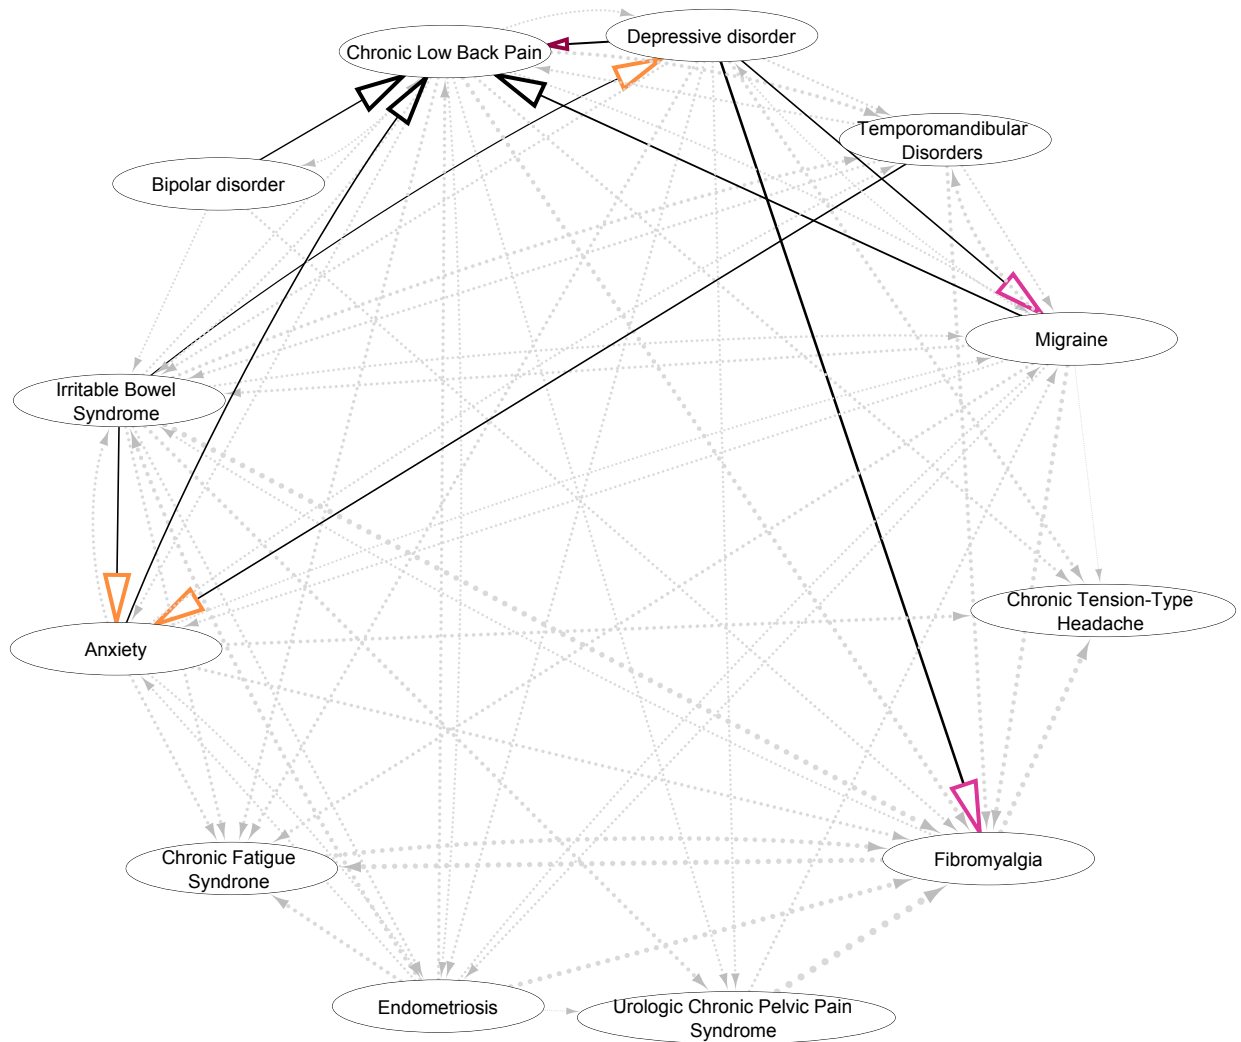

91

92 **Fig 1. The overrepresentation of specific pairwise relations between COPC and mental conditions, in**

93 **females and non-White races.** Each node represents either a specific pain condition or mental disorder.

94 Arrows represent significant trajectories of sequential occurrences of conditions based on reference

95 demographics (white, non-Hispanic, or male). Solid edges with hollow triangle arrows represent further

96 enrichment for specific demographic subgroups that are color-coded: each Black arrow indicates that for

97 the specific directed pair of conditions Black or African American persons have significantly higher risk in

98 comparison to White persons. Likewise, orange arrows for Hispanic or Latino persons as compared to

99 non-Hispanic persons, purple arrows for females compared to males, and dark purple arrows for



100 females vs. males or African Americans vs. Whites. Dashed edges represent significant trajectories  
101 among the reference population groups.

102

103 Fig 1 demonstrates how sex, race, and ethnicity might be associated with the likelihood of developing a  
104 second COPC or mental condition following a first for 122 frequent (at least 21 occurrences) pairs of  
105 conditions that consist of at least one COPC in the pair. The connections between nodes indicate how  
106 strongly these conditions are associated with each other in sequence, by using regression analysis with  
107 White, non-Hispanic, or males as the reference group. CLBP exhibits the strongest disparity among the  
108 COPC conditions: Black or African American persons with migraine, anxiety, or depressive disorders are  
109 more likely to develop CLBP than White persons (shown in black arrows). The odds ratios of developing  
110 CLBP following migraine, anxiety, depressive, and bipolar disorders are 1.46, 1.46, 1.38, and 1.26, all  
111 statistically significant (adjusted  $p \leq 0.005$ ), as compared to White persons. These contribute to the  
112 overall enrichment of CLBP in Black or African American persons ( $OR=1.18$ , adjusted  $p < 10^{-10}$ , Table 2).

113 The Hispanic population was found more likely to develop anxiety after TMD ( $OR=3.00$ , adjusted  
114  $p=0.017$ ) or IBS ( $OR=2.42$ , adjusted  $p < 10^{-10}$ ), and develop depressive disorder after IBS ( $3.13$ , adjusted  
115  $p < 10^{-10}$ ), as compared to non-Hispanic populations (shown in orange arrows). The findings indicate  
116 certain COPCs and mental health progression patterns are disproportionate across ethnic groups. Lastly,  
117 we observed sex disparity in the progression of COPC comorbidities: females were more likely to  
118 develop FM ( $OR=3.00$ , adjusted  $p=0.014$ ), MHA ( $OR=1.86$ , adjusted  $p=0.013$ ), and CLBP ( $OR=1.50$ ,  
119 adjusted  $p=0.011$ ) after depressive disorders (shown in dark purple arrows). Of note, income level was  
120 adjusted during the examination of disparity, and the effect was concordant to the literature.

121 Specifically, we found lower income is associated with an elevated risk of subsequently developing

122 another COPC or mental disorder, as compared to the highest income group (\$200,000 USD annually),  
123 with an  $OR \geq 1.09$  and an adjusted  $p < 0.05$ , except for a few cases that were underpowered.

## 124 **Materials and Methods**

125 We used the AoURP(8) version 7, which involved the 1981-2022 electronic health records (EHR) of over  
126 250,000 participants. Only individuals sharing EHR data were included, and those whose data showed  
127 apparent quality issues were also excluded. Variables studied include incidence of each COPC and  
128 mental condition, sex at birth, age, ethnicity, race, gender, and income level. Then, statistical differences  
129 were derived from the comparison between an examined level of a disparity factor and its reference  
130 level (e.g., female sex at birth versus male) with respect to a COPC/mental condition outcome. The  
131 research protocol received a waiver from the Institutional Review Board (IRB) of the University of  
132 Arizona.

133 The determination of COPC/mental cases is as follows:

134 (1) Identifying episodes of COPC and mental conditions: We cataloged COPC and mental health  
135 conditions using the ICD-10 (14) and ICD-9 (1) codes recognized by the research community. Utilizing  
136 terms from the literature and descriptions, we linked the conditions to the corresponding standard  
137 concept IDs in AoURP. These codes and concept IDs formed the criteria for identifying potential cases.

138 (2) Establishing chronicity: A condition was deemed chronic if it was diagnosed on at least two separate  
139 episodes, a minimum of 90 days apart, aligning with standards accepted by the pain research  
140 community.

141 (3) Determining the incidence, or earliest onset: To establish each patient's order of distinct conditions,  
142 we identified the earliest onset or incidence for each condition based on diagnosis dates. Additionally,

143 we mandated that the onset of each condition of a patient occurs at least one year after his/her first  
144 EHR record, to minimize bias from incomplete historical data.

145 The conditions were first analyzed for their disproportionate effect on underrepresented groups, then  
146 for elevated risk to progress to other conditions, using reference groups for comparison. We built a  
147 separate cohort for each disparity factor's incidence of developing a COPC/mental disease or  
148 progressing to another COPC. The process of cohort selection for each analysis proceeded as follows:

149 (1) Building a cohort for each disparity level in developing a COPC/mental condition: Each level (e.g.,  
150 African American) of a disparity factor (e.g., race) was compared to a reference level (e.g., White).  
151 We constructed a cohort of participants based on the studied or the reference level, choosing the  
152 smaller level whenever applicable. The same number of participants were selected for each of the  
153 two levels, further matched by other demographic variables, such as sex at birth, birth year  
154 (categorized in decade intervals), and race. We conducted random sampling without replacement  
155 from the factor group that had more samples (usually the reference group, e.g., White), ensuring an  
156 equivalent number of participants from the larger group for each demographic combination.  
157 Infrequently, when there were not enough samples to achieve a complete demographic match for a  
158 particular demographic feature combination, we opted for partial matching. The hierarchy for  
159 matching was sex, followed by birth year group, and then race.

160 (2) Building a cohort for each disease progression with at least 21 occurrences (per AoU policy): Starting  
161 from any COPC/mental condition, we divided the participants with EHR into two groups, those with  
162 and without the start condition. We then matched the patients with the starting COPC/mental  
163 condition from those without the condition, by the sex, age interval, and race, similar to the  
164 procedure above. Then, we examined the difference in the incidence of other conditions after the  
165 start of the COPC/mental condition between the two groups of participants. We determined the

166 disparity effect of demographic factors as compared to their reference level concerning this specific  
167 cohort of disease progression.

168 After building the cohort for each study, we evaluated the elevated risk of developing the first or  
169 progressing to another condition. Each COPC/mental condition other than the start condition served as  
170 an outcome variable for the cohort. We applied a logistic regression model to assess the statistical  
171 significance of each disparity factor, specifically the odds ratio of developing or progressing to the  
172 outcome condition, relative to the reference level. An odds ratio exceeding 1 with statistical significance  
173 suggests a disparity in the condition. We also included a socioeconomic factor in the model: income  
174 level. In this analysis, birth year was treated as numerical data, whereas sex, race, ethnicity, and income  
175 level were handled as categorical variables. To account for the possibility of multiple comparison errors,  
176 we applied the Bonferroni correction. This approach is thorough and robust, leveraging longitudinal data  
177 to recapture pairwise chronic pain condition progression and demonstrate disparities.

178

## 179 **Discussion**

180 Our results recaptured previous evidence (15) on the disparity of COPC incidence, which may be  
181 attributed to subconscious biases within the healthcare system (16). Moreover, the study made a  
182 unique contribution by elucidating disparities linked to specific progression patterns of these conditions  
183 (17). For example, an increased risk for Hispanic populations to develop anxiety or depression after IBS.  
184 While demographic disparities in developing individual COPC conditions have been frequently reported,  
185 studies investigating disparities in their progression are rare. Not only that multiple COPCs are  
186 associated with more complex outcomes (18), but the nuanced progression disparities offer critical  
187 information on potentially optimizing chronic pain management and cross-specialty coordination.

188 Not all observed progressions were statistically significant across demographic variables (e.g., sex) for  
189 some COPCs. This outcome is likely due to the underpowered nature of certain cohort groups, limiting  
190 the ability to detect subtle differences in COPC progression. The limitation in statistical power may stem  
191 from the sample sizes for progression between some COPC pairs (19) (e.g., between CTTH and TMD) or  
192 in certain strata, particularly when the data is segmented by multiple dimensions such as age, sex, race,  
193 and socioeconomic status. Despite these limitations, the observed trends offer valuable insights into the  
194 complex interplay among these factors in shaping chronic pain manifestations.

195 Future research should be able to build on the discovered correlations, exploring the causes and effects  
196 of these correlations. Our progression analysis represents a promising approach to health disparity  
197 research, especially as more data becomes available. For example, there is limited data for studying  
198 chronic pain disparities experienced by intersex persons (20). Such research is crucial for developing  
199 effective pain management strategies to address the needs of diverse populations (21).

200 In conclusion, research on progressions in health disparities in individuals with chronic overlapping pain  
201 conditions (COPCs) remains limited. By leveraging rich longitudinal data in the All of Us Research  
202 Program, we conducted a novel study to evaluate the disparate risk across demographic groups for their  
203 progression patterns in developing one COPC or mental condition after another. Our results not only  
204 reinforced existing evidence, but also uncovered lesser-known associations, such as the higher risk of  
205 progressing from IBS to depressive disorder in Hispanic populations (OR:3.13, adjusted  $p < 10^{-10}$ ). By  
206 recognizing the confluence of demographic and socioeconomic factors, we anticipate such data-driven  
207 research will inform more contextualized strategies in caring for our diverse populations affected by  
208 chronic pains.

209 **Acknowledgements**

210 This work is funded by NIDCR/NIH R21DE031424. We gratefully acknowledge All of Us participants for  
211 their contributions, without whom this research would not have been possible. We also thank the  
212 National Institutes of Health's All of Us Research Program for making available the participant data  
213 examined in this study.

214 **References**

- 215 1. Irwin MN, Smith MA. Validation of ICD-9 codes for identification of chronic overlapping  
216 pain conditions. *Journal of Pain & Palliative Care Pharmacotherapy*. 2022;36(3):166-77.
- 217 2. Goesling J, Lin LA, Clauw DJ. Psychiatry and pain management: at the intersection of  
218 chronic pain and mental health. *Current psychiatry reports*. 2018;20:1-8.
- 219 3. Quiton RL, Leibel DK, Boyd EL, Waldstein SR, Evans MK, Zonderman AB.  
220 Sociodemographic patterns of pain in an urban community sample: an examination of  
221 intersectional effects of sex, race, age, and poverty status. *Pain*. 2020;161(5):1044-51.
- 222 4. Michael GE, Sporer KA, Youngblood GM. Women are less likely than men to receive  
223 prehospital analgesia for isolated extremity injuries. *The American journal of emergency*  
224 *medicine*. 2007;25(8):901-6.
- 225 5. Green CR, Anderson KO, Baker TA, Campbell LC, Decker S, Fillingim RB, et al. The  
226 unequal burden of pain: confronting racial and ethnic disparities in pain. *Pain medicine*.  
227 2003;4(3):277-94.
- 228 6. Hollingshead NA, Meints SM, Miller MM, Robinson ME, Hirsh AT. A comparison of  
229 race-related pain stereotypes held by White and Black individuals. *Journal of applied social*  
230 *psychology*. 2016;46(12):718-23.
- 231 7. Thurston KL, Zhang SJ, Wilbanks BA, Billings R, Aroke EN. A systematic review of race,  
232 sex, and socioeconomic status differences in postoperative pain and pain management. *Journal*  
233 *of PeriAnesthesia Nursing*. 2023;38(3):504-15.
- 234 8. Sankar PL, Parker LS. The Precision Medicine Initiative's All of Us Research Program:  
235 an agenda for research on its ethical, legal, and social issues. *Genetics in Medicine*.  
236 2017;19(7):743-50.
- 237 9. Hooten WM, editor *Chronic pain and mental health disorders: shared neural*  
238 *mechanisms, epidemiology, and treatment*. Mayo Clinic Proceedings; 2016: Elsevier.
- 239 10. Fillingim RB, Ohrbach R, Greenspan JD, Sanders AE, Rathnayaka N, Maixner W, et al.  
240 Associations of psychologic factors with multiple chronic overlapping pain conditions. *Journal of*  
241 *oral & facial pain and headache*. 2020;34(Suppl):s85.
- 242 11. Charleston IV L. Headache disparities in African-Americans in the United States: a  
243 narrative review. *Journal of the National Medical Association*. 2021;113(2):223-9.
- 244 12. Bresnahan M, Begg MD, Brown A, Schaefer C, Sohler N, Insel B, et al. Race and risk of  
245 schizophrenia in a US birth cohort: another example of health disparity? *International journal of*  
246 *epidemiology*. 2007;36(4):751-8.
- 247 13. Olbert CM, Nagendra A, Buck B. Meta-analysis of Black vs. White racial disparity in  
248 schizophrenia diagnosis in the United States: Do structured assessments attenuate racial  
249 disparities? *Journal of abnormal psychology*. 2018;127(1):104.

- 250 14. Schrepf A, Phan V, Clemens JQ, Maixner W, Hanauer D, Williams DA. ICD-10 codes for  
251 the study of chronic overlapping pain conditions in administrative databases. *The journal of*  
252 *pain*. 2020;21(1-2):59-70.
- 253 15. Meints SM, Wang V, Edwards RR. Sex and race differences in pain sensitization among  
254 patients with chronic low back pain. *The Journal of Pain*. 2018;19(12):1461-70.
- 255 16. Hoffman KM, Trawalter S, Axt JR, Oliver MN. Racial bias in pain assessment and  
256 treatment recommendations, and false beliefs about biological differences between blacks and  
257 whites. *Proceedings of the National Academy of Sciences*. 2016;113(16):4296-301.
- 258 17. Hamilton TM, Reese JC, Air EL. Health care disparity in pain. *Neurosurgery Clinics*.  
259 2022;33(3):251-60.
- 260 18. Logan DE, Donado C, Kaczynski K, Lebel A, Schechter N. From one pain to many: the  
261 emergence of overlapping pains in children and adolescents. *The Clinical Journal of Pain*.  
262 2021;37(6):404-12.
- 263 19. Zeng C, Schlueter DJ, Tran TC, Babbar A, Cassini T, Bastarache LA, et al. Comparison  
264 of phenomic profiles in the All of Us Research Program against the US general population and  
265 the UK Biobank. *Journal of the American Medical Informatics Association*. 2024;31(4):846-54.
- 266 20. Osborne NR, Davis KD. Sex and gender differences in pain. *International Review of*  
267 *Neurobiology*. 164: Elsevier; 2022. p. 277-307.
- 268 21. Hirsh A, Hollingshead N, Bair M, Matthias M, Wu J, Kroenke K. The influence of patient's  
269 sex, race and depression on clinician pain treatment decisions. *European Journal of Pain*.  
270 2013;17(10):1569-79.

271

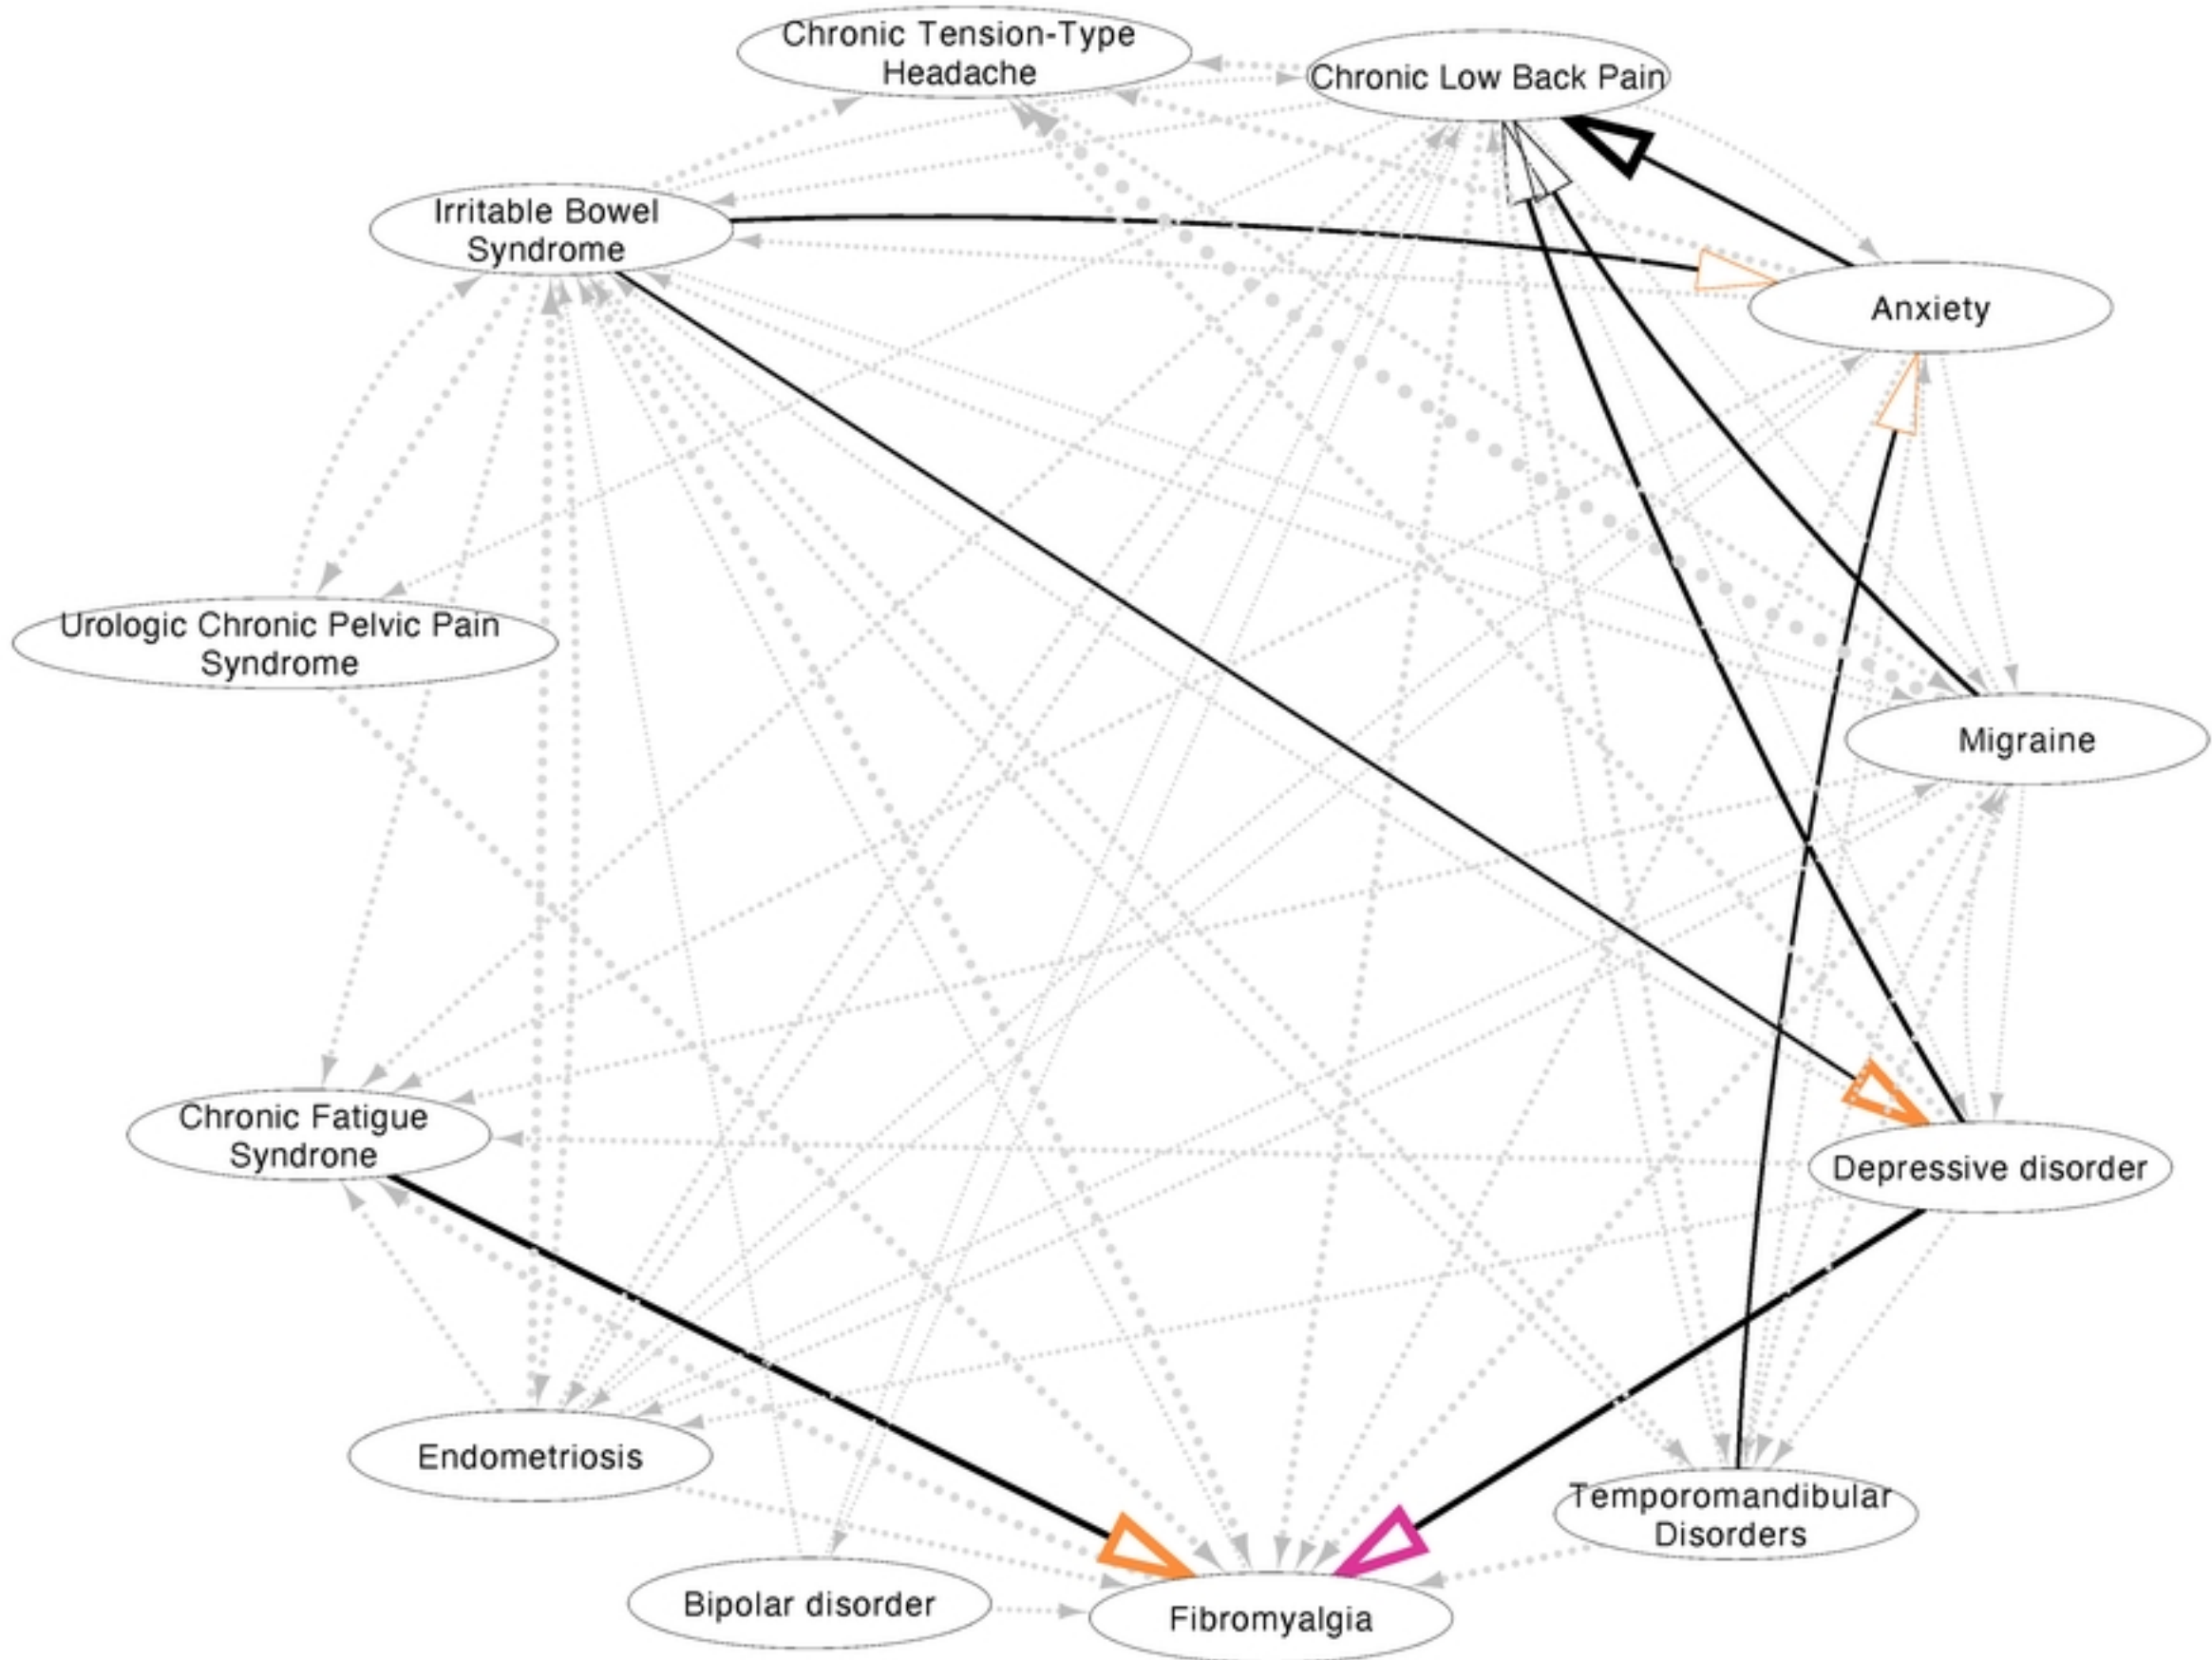

Fig 1
